# Supplementary material for: A Screening of Epigenetic Therapeutic Targets for Non-Small Cell Lung Cancer Reveals PADI4 and KDM6B as Promising Candidates
Source: MDPI journal article supplement (doi:10.3390/ijms231911911), 2022-10-07
Supplement: s1 [file s1]

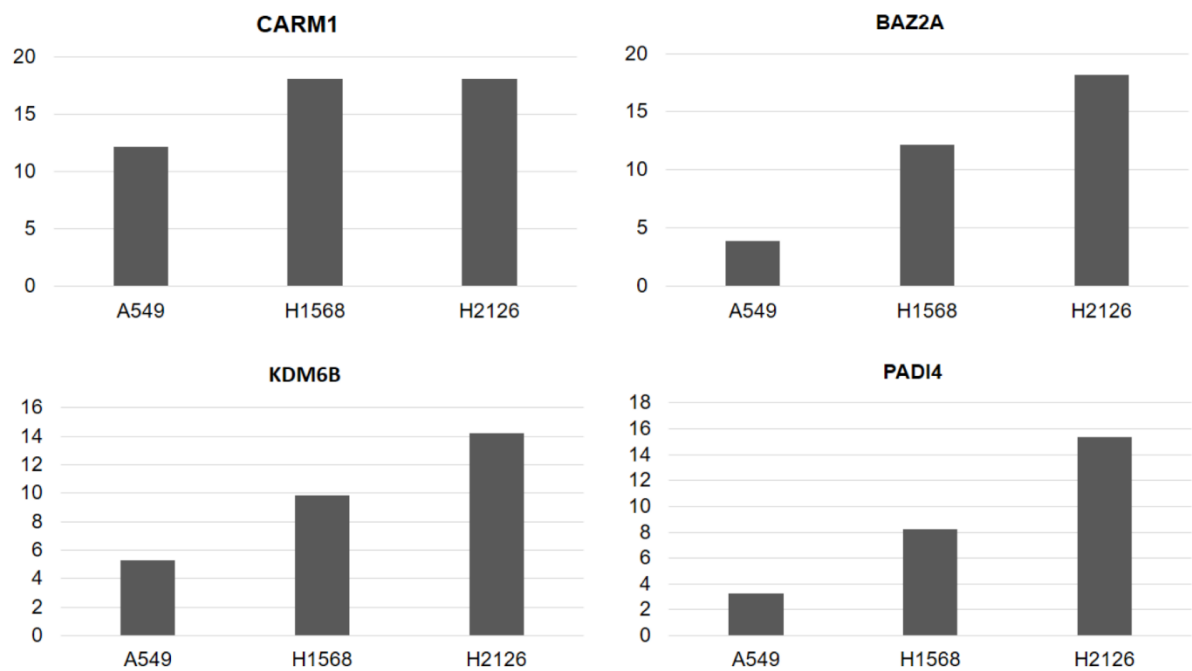

**Figure S1.** *In silico* gene expression analysis of 4 epigenetic targets in pulmonary adenocarcinoma cell lines. Graphs are presented as the mean of normalized expression values.

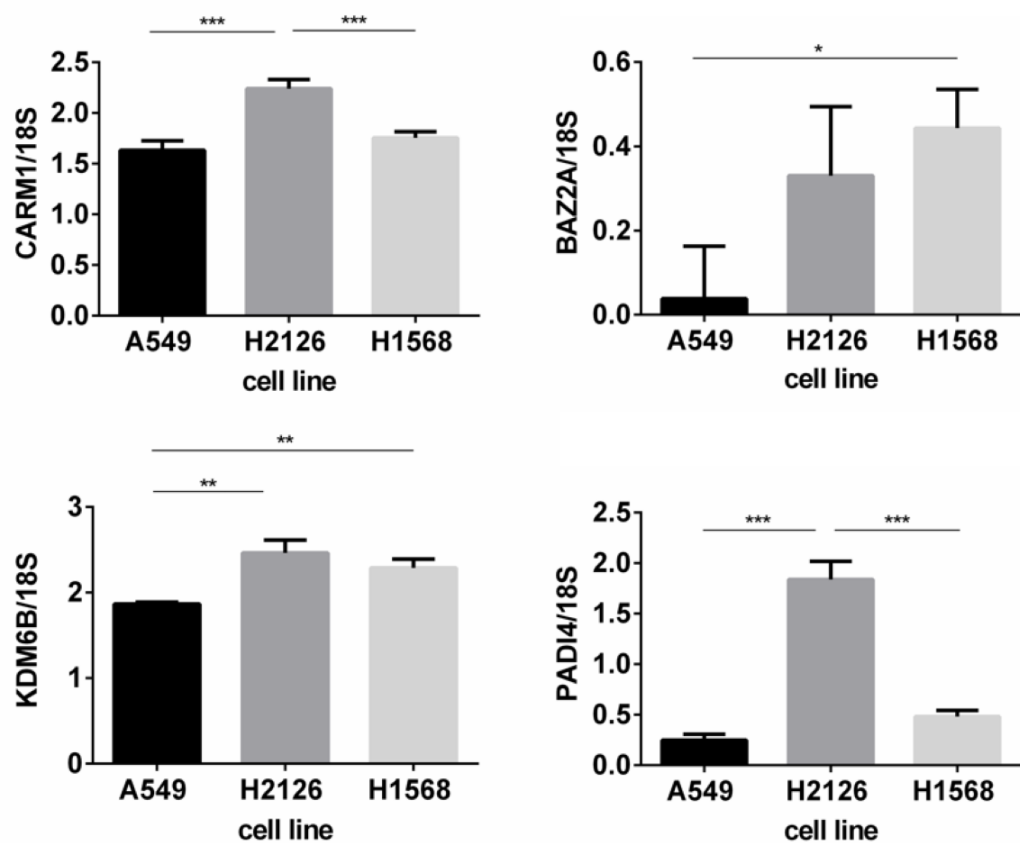

**Figure S2.** Epigenetic target gene expression (\* $p < 0.05$ ; \*\* $p < 0.01$ ; \*\*\* $p < 0.001$ ; \*\*\*\* $p < 0.0001$  - One way ANOVA followed by multiple comparisons test from Tukey).

**Table S1.** Differential gene expression analysis for A549 cell line after the treatment with PADI4 and KDM6B epigenetic inhibitors. The results selected genes based on FDR < 0.05 and LogFC > 1; < -1.

| PADI4 (down-regulated genes) |          |          |          |          |
|------------------------------|----------|----------|----------|----------|
| Gene                         | logFC    | logCPM   | P value  | FDR      |
| ABLIM3                       | -2.16598 | 3.896844 | 6.68E-33 | 2.18E-29 |
| RFTN1                        | -2.07843 | 2.583859 | 1.05E-13 | 4.42E-11 |
| NIBAN1                       | -1.74611 | 4.702511 | 1.19E-06 | 7.71E-05 |
| PLEK2                        | -1.68459 | 1.889142 | 1.57E-08 | 2.16E-06 |
| RYR1                         | -1.65518 | 1.805821 | 6.53E-08 | 7.12E-06 |
| DHRS2                        | -1.62446 | 4.79535  | 6.82E-16 | 4.06E-13 |
| UNC5B                        | -1.5814  | 2.046634 | 2.96E-08 | 3.52E-06 |
| PXDN                         | -1.57246 | 1.364956 | 1.79E-06 | 0.000109 |
| ATF3                         | -1.5494  | 4.000687 | 4.80E-20 | 4.46E-17 |
| SERPINA3                     | -1.47609 | 1.680433 | 0.002389 | 0.02837  |
| RAB39B                       | -1.44302 | 2.990452 | 1.65E-08 | 2.23E-06 |
| CXCL8                        | -1.42821 | 2.971476 | 2.47E-08 | 3.06E-06 |
| IL11                         | -1.41114 | 2.883052 | 8.46E-06 | 0.000386 |
| SYT13                        | -1.40973 | 4.231187 | 1.99E-20 | 2.00E-17 |
| DRD1                         | -1.40966 | 3.293555 | 2.86E-11 | 8.70E-09 |
| BARX1                        | -1.39148 | 0.826938 | 0.000908 | 0.014122 |
| LINC00941                    | -1.37827 | 2.190588 | 2.83E-06 | 0.000151 |
| KIF1A                        | -1.35548 | 1.89791  | 2.09E-05 | 0.000803 |
| SNORD83A                     | -1.34829 | 0.901237 | 0.000353 | 0.007312 |
| SCO2                         | -1.30857 | 0.697471 | 0.002042 | 0.025266 |
| LYPD1                        | -1.28858 | 1.07346  | 0.00179  | 0.023015 |
| SNORD63B                     | -1.28674 | 0.890429 | 0.00082  | 0.013243 |
| NLGN4Y                       | -1.27874 | 0.819972 | 0.00344  | 0.037143 |
| NCMAP                        | -1.27447 | 1.246873 | 0.000127 | 0.003378 |
| ZFP3                         | -1.26491 | 2.649588 | 5.98E-07 | 4.35E-05 |
| NIPAL4                       | -1.25077 | 2.722688 | 1.46E-07 | 1.31E-05 |
| SNORA64                      | -1.23225 | 1.610212 | 0.000136 | 0.003553 |
| KCNMA1                       | -1.21997 | 4.878998 | 6.12E-21 | 7.28E-18 |
| ZSCAN18                      | -1.21976 | 1.164495 | 0.000362 | 0.007412 |
| HBEGF                        | -1.21365 | 1.838905 | 3.34E-05 | 0.001181 |
| STC1                         | -1.19296 | 0.912192 | 0.001193 | 0.017404 |
| KCNH1                        | -1.18789 | 3.380463 | 0.000165 | 0.004105 |

|              |          |          |          |          |
|--------------|----------|----------|----------|----------|
| BCL2A1       | -1.18785 | 0.883621 | 0.004105 | 0.042303 |
| LAMC2        | -1.18455 | 4.414846 | 1.67E-09 | 2.84E-07 |
| ZNF542P      | -1.18364 | 1.63012  | 0.002579 | 0.030007 |
| EREG         | -1.18328 | 6.424183 | 3.99E-26 | 8.71E-23 |
| MIAT         | -1.15437 | 2.792116 | 1.67E-06 | 0.000102 |
| SNORA73B     | -1.1463  | 1.702368 | 8.07E-05 | 0.002373 |
| TAS2R5       | -1.13598 | 0.88959  | 0.003545 | 0.038005 |
| SLC16A6      | -1.12895 | 1.024322 | 0.004371 | 0.044111 |
| DGAT2        | -1.11783 | 2.108499 | 0.000226 | 0.005254 |
| LINC00471    | -1.11283 | 1.409989 | 0.000427 | 0.008256 |
| TRIB3        | -1.11014 | 8.616827 | 2.38E-05 | 0.000889 |
| CITED4       | -1.10676 | 3.71473  | 4.62E-06 | 0.000229 |
| NCKAP5       | -1.09288 | 2.909523 | 2.99E-06 | 0.000158 |
| TNFRSF12A    | -1.09209 | 6.180822 | 6.35E-15 | 3.32E-12 |
| FILIP1       | -1.08797 | 2.663604 | 2.01E-05 | 0.000776 |
| DMRTA1       | -1.08438 | 1.604028 | 0.000895 | 0.014027 |
| LRRC37A6P    | -1.07934 | 1.242138 | 0.001906 | 0.024059 |
| DGUOK-AS1    | -1.06685 | 1.644268 | 0.000254 | 0.005752 |
| ANKRD1       | -1.06572 | 2.657378 | 2.29E-06 | 0.000131 |
| NOS1         | -1.05983 | 1.248634 | 0.004645 | 0.045741 |
| ZNF239       | -1.05911 | 2.827497 | 7.10E-07 | 5.00E-05 |
| KIRREL3      | -1.04891 | 3.707308 | 6.74E-10 | 1.24E-07 |
| SLFNL1       | -1.04426 | 2.31261  | 0.000421 | 0.008245 |
| PPP1R15A     | -1.03949 | 7.1728   | 3.39E-14 | 1.53E-11 |
| LOC102725231 | -1.03552 | 2.039582 | 0.000344 | 0.007163 |
| NAV2         | -1.03463 | 4.876648 | 3.60E-08 | 4.17E-06 |
| PABPC1L      | -1.01848 | 6.364791 | 4.55E-14 | 1.99E-11 |
| XDH          | -1.00992 | 1.135906 | 0.005201 | 0.049397 |
| ZNF420       | -1.00923 | 1.748509 | 0.000526 | 0.009627 |
| AKNA         | -1.0008  | 5.240594 | 2.85E-05 | 0.001034 |

| PADI4 (up-regulated genes) |          |          |          |          |
|----------------------------|----------|----------|----------|----------|
| Gene                       | logFC    | logCPM   | P value  | FDR      |
| FGB                        | 2.570617 | 6.585985 | 1.22E-99 | 1.60E-95 |
| PPARGC1A                   | 2.345716 | 1.71671  | 1.19E-10 | 2.64E-08 |
| SLC16A7                    | 2.111457 | 3.161757 | 8.55E-23 | 1.24E-19 |
| DOCK8                      | 1.884747 | 1.348758 | 2.38E-08 | 3.03E-06 |
| MYOCD                      | 1.845663 | 1.611589 | 9.80E-09 | 1.44E-06 |
| F5                         | 1.767262 | 3.026287 | 1.40E-16 | 8.73E-14 |
| TMEM151A                   | 1.737155 | 2.251023 | 6.47E-11 | 1.63E-08 |
| NRXN3                      | 1.702303 | 0.867355 | 4.99E-05 | 0.001634 |
| ITIH2                      | 1.694332 | 1.402564 | 9.44E-08 | 9.15E-06 |

|              |          |          |          |          |
|--------------|----------|----------|----------|----------|
| NID2         | 1.688522 | 1.8109   | 1.82E-09 | 2.94E-07 |
| TM4SF4       | 1.635597 | 5.034187 | 8.97E-21 | 9.79E-18 |
| A1CF         | 1.633534 | 2.74931  | 3.81E-13 | 1.39E-10 |
| CFH          | 1.577096 | 7.470666 | 1.74E-58 | 1.14E-54 |
| MUC16        | 1.52822  | 5.408622 | 5.67E-26 | 1.06E-22 |
| FAXDC2       | 1.525156 | 1.018501 | 4.87E-05 | 0.001613 |
| CFHR1        | 1.511834 | 1.975166 | 8.11E-08 | 8.11E-06 |
| KCNJ2        | 1.501049 | 1.357311 | 1.70E-05 | 0.000679 |
| ADH6         | 1.494147 | 1.897476 | 8.87E-08 | 8.80E-06 |
| SPTLC3       | 1.450007 | 1.662017 | 6.30E-07 | 4.55E-05 |
| MROH2A       | 1.392993 | 1.010119 | 0.000121 | 0.003244 |
| LINC01474    | 1.392282 | 0.659862 | 0.000595 | 0.010531 |
| LRRC29       | 1.388649 | 0.966035 | 8.24E-05 | 0.002413 |
| SOX2         | 1.383915 | 0.979558 | 0.000455 | 0.008675 |
| CHL1         | 1.37935  | 0.729878 | 0.000382 | 0.007721 |
| HOOK1        | 1.37373  | 2.231556 | 9.18E-07 | 6.22E-05 |
| GOT1-DT      | 1.353048 | 1.383392 | 0.00044  | 0.008445 |
| UGT1A7       | 1.352245 | 2.208636 | 6.87E-08 | 7.23E-06 |
| FGA          | 1.346355 | 5.988379 | 4.64E-33 | 2.03E-29 |
| TM4SF20      | 1.334241 | 6.238076 | 5.25E-28 | 1.37E-24 |
| ENTPD2       | 1.330111 | 2.454085 | 2.68E-07 | 2.11E-05 |
| CEACAM16-AS1 | 1.327011 | 0.533268 | 0.005012 | 0.048227 |
| STAG3L1      | 1.321903 | 0.513889 | 0.003226 | 0.035388 |
| TM4SF5       | 1.321381 | 0.829997 | 0.000782 | 0.012869 |
| ASB4         | 1.320708 | 2.539827 | 3.16E-06 | 0.000166 |
| KCNJ16       | 1.320141 | 1.168848 | 0.001778 | 0.022919 |
| KCNQ1        | 1.313789 | 0.727692 | 0.000572 | 0.010216 |
| DPEP1        | 1.312026 | 2.063608 | 1.30E-06 | 8.24E-05 |
| TENM3        | 1.309977 | 4.936187 | 4.28E-25 | 7.00E-22 |
| DDIT4L       | 1.303926 | 1.90864  | 6.49E-06 | 0.000303 |
| CEACAM1      | 1.303799 | 3.445515 | 4.59E-11 | 1.28E-08 |
| TNFRSF13C    | 1.281089 | 1.668056 | 0.000149 | 0.003785 |
| NPY1R        | 1.27707  | 1.034076 | 0.000558 | 0.010053 |
| LOC105377744 | 1.276757 | 0.772785 | 0.001068 | 0.016102 |
| RNF224       | 1.274336 | 0.983359 | 0.000293 | 0.006386 |
| NEB          | 1.263852 | 3.473212 | 2.50E-08 | 3.06E-06 |
| UNC13D       | 1.260612 | 4.64725  | 1.33E-16 | 8.69E-14 |
| LOC101926887 | 1.258073 | 1.008998 | 0.002482 | 0.029194 |
| CDH16        | 1.254207 | 0.84291  | 0.001268 | 0.018054 |
| COL1A1       | 1.248641 | 3.175263 | 1.60E-09 | 2.76E-07 |
| ZNF554       | 1.229245 | 1.240794 | 0.000205 | 0.00489  |
| BCAS1        | 1.221997 | 4.132543 | 1.79E-10 | 3.85E-08 |

|              |          |          |          |          |
|--------------|----------|----------|----------|----------|
| IFIT1        | 1.178667 | 1.761142 | 0.000228 | 0.00529  |
| ARHGEF16     | 1.174711 | 3.00665  | 2.23E-07 | 1.86E-05 |
| NRIP3        | 1.170341 | 0.95106  | 0.001669 | 0.021906 |
| ANK3         | 1.150479 | 2.475505 | 3.94E-05 | 0.001356 |
| PHEX         | 1.148861 | 1.189953 | 0.000452 | 0.008644 |
| SH2B2        | 1.148361 | 3.474898 | 1.70E-10 | 3.71E-08 |
| UPK3B        | 1.146103 | 1.910386 | 7.17E-05 | 0.002173 |
| FLRT2        | 1.145093 | 1.445011 | 0.000172 | 0.004253 |
| KCTD13-DT    | 1.131037 | 1.473627 | 0.000131 | 0.003437 |
| PCAT7        | 1.126435 | 1.122828 | 0.001979 | 0.024672 |
| CORO2A       | 1.125714 | 4.747707 | 1.01E-18 | 8.28E-16 |
| ARID5B       | 1.105971 | 3.272508 | 6.83E-08 | 7.23E-06 |
| CIDEC        | 1.104077 | 1.379261 | 0.000362 | 0.007412 |
| S1PR5        | 1.09904  | 1.482257 | 0.00126  | 0.018019 |
| RORA         | 1.093546 | 0.839522 | 0.002436 | 0.028766 |
| KCNQ10T1     | 1.092971 | 1.895612 | 7.84E-05 | 0.002321 |
| KLF9         | 1.089679 | 3.878726 | 6.37E-10 | 1.19E-07 |
| VIL1         | 1.087472 | 1.070202 | 0.002196 | 0.026522 |
| FBXO2        | 1.084228 | 2.155773 | 6.36E-05 | 0.001973 |
| VASH2        | 1.082665 | 2.676476 | 2.68E-06 | 0.000146 |
| GPR199P      | 1.079519 | 0.964713 | 0.003169 | 0.034947 |
| TJP3         | 1.074671 | 3.837274 | 3.42E-11 | 9.94E-09 |
| QPRT         | 1.068836 | 3.531338 | 5.90E-10 | 1.12E-07 |
| KRT4         | 1.066978 | 4.705169 | 2.42E-13 | 9.60E-11 |
| FGG          | 1.06431  | 5.238643 | 5.11E-20 | 4.46E-17 |
| C1orf21      | 1.052845 | 1.703124 | 0.000165 | 0.004105 |
| MYO1D        | 1.043369 | 2.764934 | 1.28E-06 | 8.16E-05 |
| BCL2L15      | 1.042217 | 1.243708 | 0.003053 | 0.034062 |
| LOC107985728 | 1.040762 | 4.791001 | 1.37E-12 | 4.61E-10 |
| LOC105373424 | 1.03886  | 1.63829  | 0.003362 | 0.036572 |
| FAM83A       | 1.037041 | 1.849497 | 0.000478 | 0.008969 |
| ALDOC        | 1.033297 | 1.424643 | 0.003119 | 0.03461  |
| SKIDA1       | 1.031406 | 1.393316 | 0.000675 | 0.011569 |
| PDK4         | 1.028369 | 7.009559 | 2.62E-18 | 2.01E-15 |
| DCDC1        | 1.023172 | 1.854705 | 0.000833 | 0.013374 |
| NPNT         | 1.020227 | 3.10865  | 4.66E-07 | 3.45E-05 |
| EIF2AK3-DT   | 1.018657 | 0.910279 | 0.004377 | 0.044134 |
| LIN7A        | 1.011893 | 4.496597 | 3.58E-13 | 1.34E-10 |
| ATP6V0D1-DT  | 1.004192 | 1.334714 | 0.002926 | 0.033018 |

**KDM6B (down-regulated genes)**

| Gene         | logFC    | logCPM   | P value  | FDR      |
|--------------|----------|----------|----------|----------|
| PRDM1        | -1.00918 | 2.289796 | 3.07E-05 | 0.000457 |
| ANKRD1       | -1.01703 | 2.662901 | 2.39E-06 | 4.89E-05 |
| KIF1A        | -1.01714 | 1.979568 | 0.003475 | 0.022257 |
| MYPN         | -1.03131 | 0.811733 | 0.008964 | 0.045505 |
| HK2          | -1.03778 | 1.076437 | 0.004464 | 0.026911 |
| ZNF583       | -1.05113 | 1.023525 | 0.001577 | 0.012154 |
| KCNMA1       | -1.05279 | 4.928109 | 1.12E-29 | 6.05E-27 |
| RFTN1        | -1.06209 | 2.805277 | 1.24E-07 | 3.67E-06 |
| KLC2-AS1     | -1.0629  | 0.872893 | 0.003692 | 0.023349 |
| ZSCAN18      | -1.07563 | 1.184041 | 0.000509 | 0.004875 |
| SNORA73B     | -1.07615 | 1.707718 | 4.21E-05 | 0.000605 |
| ZNF561-AS1   | -1.07662 | 0.97798  | 0.001467 | 0.011502 |
| MSS51        | -1.07841 | 1.101731 | 0.001592 | 0.012255 |
| ZFP3         | -1.09129 | 2.68986  | 1.09E-07 | 3.27E-06 |
| ZFP82        | -1.09731 | 1.561737 | 0.000181 | 0.002067 |
| MATN1-AS1    | -1.10297 | 1.143075 | 0.001105 | 0.009121 |
| LOC112268035 | -1.10403 | 0.862505 | 0.00171  | 0.012948 |
| FUT1         | -1.10483 | 1.335725 | 0.000239 | 0.002597 |
| CDCP1        | -1.13683 | 3.919086 | 2.12E-15 | 2.15E-13 |
| ZNF239       | -1.13949 | 2.797196 | 4.06E-09 | 1.68E-07 |
| LOC112268412 | -1.14073 | 1.084645 | 0.000505 | 0.004847 |
| SCO2         | -1.15653 | 0.715384 | 0.002841 | 0.019163 |
| LAMP3        | -1.16051 | 0.247896 | 0.010156 | 0.049873 |
| SLCO2B1      | -1.16589 | 1.126291 | 0.001799 | 0.013444 |
| ATF3         | -1.18165 | 4.09472  | 8.54E-18 | 1.21E-15 |
| SYT13        | -1.18472 | 4.290846 | 1.23E-17 | 1.73E-15 |
| THBD         | -1.1887  | 2.697802 | 1.19E-06 | 2.65E-05 |
| FBXW10       | -1.18972 | 2.398985 | 1.32E-06 | 2.89E-05 |
| ACY1         | -1.19254 | 0.737035 | 0.001834 | 0.01364  |
| FILIP1       | -1.20499 | 2.622781 | 1.90E-06 | 3.97E-05 |
| ABI3BP       | -1.21655 | 0.05122  | 0.008286 | 0.043073 |
| ZDHHC14      | -1.2228  | 1.543091 | 0.00025  | 0.002696 |
| MSX1         | -1.22676 | 0.801199 | 0.00179  | 0.013418 |
| SLIT1        | -1.23374 | 0.550856 | 0.0019   | 0.014031 |
| ADGRE1       | -1.23723 | 0.4614   | 0.003585 | 0.022823 |
| RAB39B       | -1.24426 | 3.033895 | 2.07E-07 | 5.84E-06 |
| CXCL8        | -1.26235 | 3.005777 | 2.57E-10 | 1.33E-08 |
| DHRS2        | -1.28607 | 4.881452 | 6.15E-20 | 1.20E-17 |
| EGLN2        | -1.29528 | 1.498515 | 0.000137 | 0.001622 |
| SLC2A1-DT    | -1.31344 | 0.051177 | 0.007315 | 0.039311 |
| HBEGF        | -1.31694 | 1.798411 | 7.91E-07 | 1.84E-05 |

|           |          |          |          |          |
|-----------|----------|----------|----------|----------|
| LINC00638 | -1.3413  | 0.575132 | 0.002282 | 0.016197 |
| EXOC3L2   | -1.37088 | 0.736812 | 0.000228 | 0.002496 |
| HNRNPR    | -1.51659 | 0.119557 | 0.001237 | 0.010007 |
| PLAC1     | -1.59695 | 0.611281 | 8.53E-05 | 0.001099 |
| SLC16A6   | -1.67655 | 0.871747 | 3.47E-05 | 0.000509 |
| NOS1      | -1.68312 | 1.082928 | 2.83E-05 | 0.000427 |
| ZNF420    | -1.6859  | 1.566053 | 2.33E-08 | 8.23E-07 |
| DMGDH     | -1.78063 | 0.307399 | 0.000319 | 0.003305 |
| TTC41P    | -1.85169 | 0.032922 | 0.000185 | 0.002109 |
| ABLIM3    | -1.86819 | 3.948763 | 4.34E-33 | 3.26E-30 |
| BARX1     | -1.87199 | 0.703033 | 1.42E-05 | 0.000236 |
| NLGN4Y    | -1.97709 | 0.657243 | 6.57E-06 | 0.000121 |
| SUSD5     | -2.15096 | 0.433536 | 4.78E-06 | 9.08E-05 |
| PXDN      | -2.21284 | 1.228312 | 8.45E-10 | 3.99E-08 |
| CIART     | -2.7148  | -0.37603 | 1.02E-05 | 0.000178 |

Source: Lesbon, J. C. C. (2022).

**Table S2.** Inhibitory epigenetic molecules acquired in collaboration with Structural Genomics Consortium (SGC).

| <b>Epigenetic target</b> | <b>Enzyme class</b> | <b>Probe</b>     |
|--------------------------|---------------------|------------------|
| BRD2                     | Bromodomains        | JQ1              |
| BRD3                     | Bromodomains        | JQ1              |
| BRD4                     | Bromodomains        | JQ1              |
| BRDT                     | Bromodomains        | JQ1              |
| BAZ2B                    | Bromodomains        | GSK2801/BAZ2-ICR |
| BAZ2A                    | Bromodomains        | GSK2801/BAZ2-ICR |
| BRPF1                    | Bromodomains        | NI-57            |
| BRD1                     | Bromodomains        | NI-57            |
| BRPF3                    | Bromodomains        | NI-57            |
| SMARCA2                  | Bromodomains        | PFI-3            |
| SMARCA4                  | Bromodomains        | PFI-3            |
| PBRM1                    | Bromodomains        | PFI-3            |
| SMYD2                    | Metiltransferases   | BAY-598          |
| KDM6B                    | Demetilases         | GSK-J4           |
| ADA2                     | Bromodomaais        | NVS-CECR2-1      |
| CECR2                    | Bromodomaais        | NVS-CECR2-2      |
| PADI4                    | Deiminases          | GSK484           |
| DOT1L                    | Metiltransferases   | SGC0946          |
| WDR5                     | Metiltransferases   | OICR-9429        |
| SETD7                    | Metiltransferases   | R-PFI-2          |

|         |                             |              |
|---------|-----------------------------|--------------|
| IDH1    | IDH1 mutant inhibitor       | GSK864       |
| EZH2    | Metiltransferases           | GSK343       |
| KDM1A   | Demetilases                 | GSK-LSD1     |
| L3MBTL3 | Reader de lisinas metiladas | UNC1215      |
| BRD9    | Bromodomains                | Bi-9564      |
| BRD7    | Bromodomains                | Bi-9564      |
| EZH1    | Metiltransferases           | UNC1215      |
| KMT5B   | Metiltransferases           | A-196        |
| KMT5C   | Metiltransferases           | A-196        |
| EHMT2   | Metiltransferases           | A-366        |
| CREBBP  | Acetilases                  | SGC-CBP30    |
| EP300   | Acetilases                  | SGC-CBP30    |
| PRMT1   | Metiltransferases           | MS023        |
| PRMT3   | Metiltransferases           | MS023        |
| CARM1   | Metiltransferases           | TP-064/MS023 |
| PRMT5   | Metiltransferases           | MS023        |
| PRMT6   | Metiltransferases           | MS023        |
| PRMT8   | Metiltransferases           | MS023        |

Source: Lesbon, J. C. C. (2022).

| KDM6B (up-regulated genes) |         |          |            |            |
|----------------------------|---------|----------|------------|------------|
| Gene                       | logFC   | logCPM   | P value    | FDR        |
| LOC100507634               | 2.91893 | -0.17269 | 8.84E-08   | 2.74E-06   |
| TMEM132D-AS1               | 2.55070 | 1.53118  | 5.74E-14   | 4.70E-12   |
| LOC105373180               | 2.49009 | -0.49535 | 1.73E-05   | 0.00027748 |
| FGB                        | 2.42660 | 6.45541  | 2.99E-266  | 4.04E-262  |
| TMED2-DT                   | 2.38016 | -0.30233 | 1.22E-05   | 0.00020591 |
| HS3ST3B1                   | 2.30133 | 0.15776  | 4.56E-07   | 1.15E-05   |
| ADGRV1                     | 2.20827 | 0.00157  | 1.06E-05   | 0.00018409 |
| SLC16A7                    | 2.18723 | 3.21911  | 1.47E-37   | 1.53E-34   |
| F13B                       | 2.15555 | 0.28386  | 1.99E-06   | 4.14E-05   |
| BCHE                       | 2.10230 | 0.23827  | 0.0007448  | 0.00671062 |
| MYOCD                      | 2.08913 | 1.81244  | 3.62E-14   | 3.06E-12   |
| F5                         | 2.02463 | 3.22218  | 3.36E-32   | 2.27E-29   |
| CTTNBP2                    | 2.00077 | 1.03086  | 1.23E-08   | 4.69E-07   |
| BCO2                       | 1.92912 | 0.25348  | 0.00013704 | 0.00162185 |
| TEX19                      | 1.88915 | -0.13298 | 0.00033765 | 0.00347018 |
| DOCK8                      | 1.87354 | 1.35195  | 3.65E-09   | 1.53E-07   |
| VIL1                       | 1.86738 | 1.62090  | 3.33E-11   | 2.04E-09   |
| LOC101927699               | 1.82739 | 0.31321  | 2.75E-05   | 0.00041889 |



|              |         |          |            |            |
|--------------|---------|----------|------------|------------|
| LOC102724908 | 1.78606 | 0.65342  | 5.15E-06   | 9.70E-05   |
| LOC107986087 | 1.77341 | -0.21533 | 0.00049751 | 0.00478227 |
| ACSL5        | 1.75182 | 0.07265  | 0.00011311 | 0.00137474 |
| LOC105377744 | 1.68256 | 1.04906  | 6.21E-06   | 0.00011457 |
| LOC105378539 | 1.66500 | -0.37244 | 0.00234837 | 0.01658213 |
| IDI2-AS1     | 1.62544 | -0.15317 | 0.00154094 | 0.01195511 |
| SMAD9        | 1.62518 | 0.71061  | 0.0002376  | 0.00258752 |
| TM4SF4       | 1.61606 | 5.00907  | 1.92E-51   | 5.20E-48   |
| KCNJ16       | 1.58668 | 1.34369  | 2.45E-06   | 4.99E-05   |
| MROH2A       | 1.57543 | 1.13476  | 1.12E-06   | 2.49E-05   |
| LOC105370941 | 1.56653 | -0.19430 | 0.00197322 | 0.01446989 |
| ADH6         | 1.56473 | 1.95099  | 2.22E-10   | 1.16E-08   |
| FAM110B      | 1.56337 | 0.86866  | 9.71E-06   | 0.00017036 |
| LOC105376506 | 1.53950 | 0.38498  | 0.00089339 | 0.00777975 |
| CFH          | 1.51705 | 7.42085  | 1.21E-149  | 8.21E-146  |
| CHL1         | 1.48821 | 0.81750  | 5.29E-05   | 0.00072601 |
| LOC105377685 | 1.47954 | 0.25193  | 0.00069772 | 0.00634569 |
| BMPR1B-DT    | 1.47433 | 0.43973  | 0.00046858 | 0.00455277 |
| CFHR1        | 1.47310 | 1.95477  | 1.34E-08   | 5.03E-07   |
| A1CF         | 1.47047 | 2.63674  | 3.22E-14   | 2.74E-12   |
| DCDC1        | 1.44488 | 2.14591  | 2.05E-09   | 9.05E-08   |
| PPARGC1A     | 1.43509 | 1.03928  | 1.18E-05   | 0.00020147 |
| DNAJC3-DT    | 1.40363 | 0.08976  | 0.00222498 | 0.01591038 |
| LGI4         | 1.39660 | 0.34184  | 0.00511923 | 0.02998355 |
| CCNE2        | 1.39523 | 0.34174  | 0.00095873 | 0.00820598 |
| ENG          | 1.38111 | 0.81702  | 0.000215   | 0.00238953 |
| RTKN2        | 1.37257 | 1.79983  | 1.41E-07   | 4.12E-06   |
| ABR          | 1.36219 | -0.05483 | 0.0047209  | 0.02813807 |
| LAD1         | 1.35047 | 0.68705  | 0.00021264 | 0.0023672  |
| LOC105374868 | 1.34845 | 0.26725  | 0.00209957 | 0.01528041 |
| LOC105371419 | 1.34113 | 0.15696  | 0.00436661 | 0.02645217 |
| LOC102724378 | 1.33918 | 0.05435  | 0.00404719 | 0.02496662 |
| LINC01389    | 1.33174 | -0.13322 | 0.00529932 | 0.0307316  |
| PRR15L       | 1.32871 | 0.74299  | 0.00107163 | 0.00895615 |
| NID2         | 1.32283 | 1.56492  | 1.50E-06   | 3.25E-05   |
| TENM3        | 1.32271 | 4.93870  | 1.27E-42   | 2.46E-39   |
| CALML6       | 1.32026 | -0.01767 | 0.00391348 | 0.02436238 |
| COLCA1       | 1.31428 | 0.58137  | 0.00695685 | 0.03794263 |
| MIR29B2CHG   | 1.30943 | 1.09971  | 9.75E-05   | 0.00122629 |

|                |         |          |            |            |
|----------------|---------|----------|------------|------------|
| BCL2L15        | 1.30728 | 1.40779  | 4.53E-05   | 0.00064199 |
| ZNF608         | 1.30548 | 1.88240  | 6.61E-06   | 0.00012121 |
| C6orf201       | 1.30452 | 0.38352  | 0.00839665 | 0.04335283 |
| SOX2           | 1.30061 | 0.91817  | 0.00030358 | 0.00317071 |
| SPTLC3         | 1.28716 | 1.56399  | 5.09E-06   | 9.62E-05   |
| ENTPD2         | 1.28382 | 2.42463  | 2.50E-08   | 8.67E-07   |
| SEPTIN3        | 1.27438 | 0.31230  | 0.00266797 | 0.01817422 |
| FGA            | 1.27204 | 5.92917  | 8.47E-55   | 2.86E-51   |
| PAX7           | 1.27155 | 3.93623  | 3.68E-22   | 1.01E-19   |
| NRXN3          | 1.26894 | 0.60433  | 0.00457801 | 0.02748636 |
| SHH            | 1.26680 | 3.05432  | 8.53E-10   | 4.01E-08   |
| UNC13D         | 1.26412 | 4.64299  | 9.43E-26   | 3.75E-23   |
| NRTN           | 1.25603 | 0.76442  | 0.00080912 | 0.00717534 |
| SEC24B-AS1     | 1.24466 | 0.72096  | 0.00151821 | 0.0118278  |
| COL1A1         | 1.24446 | 3.17070  | 1.89E-09   | 8.41E-08   |
| STAG3L1        | 1.24439 | 0.46580  | 0.00275711 | 0.01865908 |
| ITIH2          | 1.24337 | 1.10832  | 0.0001004  | 0.00125644 |
| MUC16          | 1.23856 | 5.19335  | 1.73E-29   | 8.99E-27   |
| LOC105370092   | 1.23185 | 0.72001  | 0.00149433 | 0.01169415 |
| ANXA8          | 1.23078 | 1.65457  | 2.98E-06   | 5.93E-05   |
| INHA           | 1.22899 | -0.07435 | 0.0078922  | 0.0417305  |
| LOC102724030   | 1.22665 | 0.03674  | 0.00877312 | 0.04475979 |
| SOX21-AS1      | 1.22348 | 0.53074  | 0.00140991 | 0.01114975 |
| FLJ16779       | 1.21312 | 1.90104  | 6.52E-07   | 1.56E-05   |
| UGT1A7         | 1.21281 | 2.12009  | 1.20E-07   | 3.57E-06   |
| LOC100506990_1 | 1.19371 | 0.12306  | 0.00861269 | 0.04411504 |
| TM4SF20        | 1.19082 | 6.13098  | 1.82E-50   | 4.11E-47   |
| ENTPD8         | 1.18210 | 0.58041  | 0.00174691 | 0.0131823  |
| LOC107985000   | 1.17830 | 0.46564  | 0.00259243 | 0.01783543 |
| LOC105373449   | 1.17364 | 0.15660  | 0.00826702 | 0.04298916 |
| LOC105376505   | 1.17040 | 0.75244  | 0.00656816 | 0.03644036 |
| HES2           | 1.16912 | 1.02996  | 0.00276148 | 0.01866068 |
| CCDC39         | 1.16847 | 1.46737  | 9.25E-05   | 0.00117375 |
| SH2B2          | 1.16345 | 3.48421  | 2.90E-14   | 2.50E-12   |
| KCTD13-DT      | 1.16325 | 1.50051  | 1.70E-05   | 0.00027402 |
| HNMT           | 1.15876 | 0.64002  | 0.00505764 | 0.02973206 |
| MYO1D          | 1.15479 | 2.84093  | 2.77E-09   | 1.18E-07   |
| ASPDH          | 1.14225 | 0.55562  | 0.00236215 | 0.01662731 |
| CIDEC          | 1.13750 | 1.40058  | 0.00061523 | 0.00572646 |

|              |         |         |            |            |
|--------------|---------|---------|------------|------------|
| MIATNB       | 1.13275 | 1.18992 | 0.00177363 | 0.01331704 |
| LOC105373195 | 1.13146 | 1.53314 | 0.00012194 | 0.00146621 |
| LOC107985728 | 1.12502 | 4.84150 | 6.84E-22   | 1.85E-19   |
| LOC105369308 | 1.12494 | 0.39725 | 0.0088978  | 0.04524218 |
| FGG          | 1.12300 | 5.27165 | 8.02E-32   | 4.93E-29   |
| SNORD87      | 1.12204 | 0.46593 | 0.00561186 | 0.03226046 |
| KCNT2        | 1.11135 | 2.38230 | 2.35E-07   | 6.43E-06   |
| SCX          | 1.11058 | 0.80582 | 0.0085579  | 0.04397722 |
| EPHA5        | 1.11047 | 0.91729 | 0.0013245  | 0.01057333 |
| BCAS1        | 1.10178 | 4.04358 | 3.10E-13   | 2.36E-11   |
| UPK3B        | 1.09826 | 1.88529 | 2.92E-05   | 0.0004379  |
| TMEM151A     | 1.09460 | 1.80913 | 1.66E-05   | 0.00026901 |
| GPR199P      | 1.09131 | 0.98394 | 0.00129707 | 0.01039735 |
| NEB          | 1.08543 | 3.34670 | 1.66E-09   | 7.42E-08   |
| LOC100130027 | 1.08285 | 1.59439 | 4.66E-05   | 0.00065553 |
| PRG4         | 1.08132 | 1.74381 | 0.00020193 | 0.00227761 |
| ADGRG5       | 1.07911 | 0.32629 | 0.00913474 | 0.04613452 |
| PDZD3        | 1.07822 | 0.47883 | 0.00632528 | 0.035442   |
| RND1         | 1.07811 | 4.48559 | 5.20E-19   | 9.12E-17   |
| BTNL9        | 1.07759 | 3.00116 | 8.81E-08   | 2.74E-06   |
| LINC02747    | 1.07558 | 1.28383 | 0.00103141 | 0.00869589 |
| LOC105377743 | 1.06443 | 1.07302 | 0.00102693 | 0.0086721  |
| WHAMMP4      | 1.06112 | 0.79636 | 0.0059365  | 0.03386736 |
| ASB4         | 1.05791 | 2.35983 | 1.43E-06   | 3.10E-05   |
| PLXNC1       | 1.04132 | 0.92704 | 0.00249928 | 0.01730418 |
| LOC102723961 | 1.04029 | 1.62333 | 0.00151199 | 0.01179827 |
| GGT5         | 1.03605 | 2.40541 | 3.53E-06   | 6.90E-05   |
| LOC107984421 | 1.03445 | 0.49158 | 0.00778925 | 0.04138041 |
| ELMO1        | 1.03194 | 3.80243 | 2.52E-14   | 2.21E-12   |
| GLIPR1L1     | 1.02675 | 0.55544 | 0.00697232 | 0.03801167 |
| MYO1A        | 1.02611 | 2.62836 | 1.77E-06   | 3.71E-05   |
| OVGP1        | 1.01537 | 1.90420 | 7.02E-05   | 0.00092966 |
| ARID5B       | 1.01418 | 3.20809 | 4.14E-08   | 1.39E-06   |
| CD82         | 1.01401 | 2.32026 | 2.46E-06   | 5.01E-05   |
| CABCOCO1     | 1.01294 | 0.90785 | 0.00455071 | 0.02734673 |
| AFF1-AS1     | 1.01114 | 0.96449 | 0.00246386 | 0.01715559 |
| SYNDIG1      | 1.01054 | 1.19860 | 0.00253554 | 0.01751935 |
| LOC107987266 | 1.00975 | 0.74164 | 0.00521019 | 0.03037141 |

**Table S3.** Primer sequence of epigenetic targets evaluated by RT-qPCR.

| Gene      | Sequence (5'-3')     |
|-----------|----------------------|
| CARM1 fw  | CACACCGACTTCAAGGACAA |
| CARM1 rev | AAAAACGACAGGATCCCAGA |
| BAZ2A fw  | AAGATGTGTGGCTACAATGG |
| BAZ2A rev | TCTGCACCCATCAGCTCCG  |
| KDM6B fw  | GCCTCTTCTCCACCAAGACC |
| KDM6B rev | GCCTGGTACTGTGCGTACTT |
| PADI4 fw  | GGCAAAGTGAAGCCAACCAG |
| PADI4 rev | GTCACAGTTCACCAGCAGGA |

Source: Lesbon, J. C. C. (2022).
